# Supplementary material for: Liberation of carbon monoxide from formic acid mediated by molybdenum oxyanions
Source: Royal Society of Chemistry journal article supplement (doi:10.1039/d3dt01983g), 2023-01-01
Supplement: d3dt01983g2.pdf [file d3dt01983g2.pdf]

Electronic Supporting Information

## Liberation of carbon monoxide from formic acid mediated by molybdenum oxyanions.

Howard Z. Ma,<sup>a</sup> Allan J. Canty<sup>b</sup> and Richard A. J. O'Hair<sup>\*a</sup>

(a) School of Chemistry and Bio21 Molecular Science and Biotechnology Institute, University of Melbourne, 30 Flemington Rd, Parkville, Victoria 3010, Australia. Fax: (+) 61 3 9347 8124; E-mail: rohair@unimelb.edu.au

(b) School of Natural Sciences – Chemistry, University of Tasmania, Private Bag 75, Hobart, Tasmania, 7001, Australia.

### Crystallography

Intensity data for  $(\text{TBA})_2[\text{Mo}_2\text{O}_7]$  was collected on a Rigaku XtaLAB Synergy at 100.0(1) K. The temperature was maintained using an Oxford Cryostream cooling device. The structures were solved by direct methods and difference Fourier synthesis.<sup>1</sup> Thermal ellipsoid plot were generated using the program Mercury<sup>2</sup> integrated within the WINGX<sup>3</sup> suite of programs.

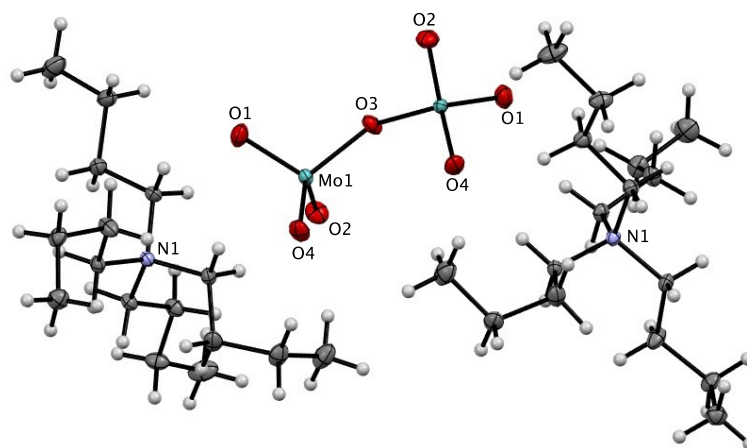

**Fig. S1** Solid-state structure of  $(\text{TBA})_2[\text{Mo}_2\text{O}_7]$ . This structure is similar to that reported in ref 20.

Crystal data for  $(\text{TBA})_2[\text{Mo}_2\text{O}_7]$ .  $\text{C}_{32}\text{H}_{72}\text{Mo}_2\text{N}_2\text{O}$ ,  $M = 788.79$ ,  $T = 100.0$  K,  $\lambda = 0.71073$  Å, Monoclinic, space group  $I2/a$ ,  $a = 17.1743(3)$ ,  $b = 13.7314(2)$ ,  $c = 18.0806(3)$  Å,  $\beta = 114.029(2)^\circ$ ,  $V = 3894.38(12)$  Å<sup>3</sup>,  $Z = 4$ ,  $Z' = 0.5$ ,  $D_c = 1.345$  mg M<sup>-3</sup>,  $\mu(\text{Mo-K}\alpha) = 0.686$  mm<sup>-1</sup>,  $F(000) = 1672$  crystal size 0.41 x 0.38 x 0.12 mm<sup>3</sup>, 30977 reflections measured  $\theta_{\text{max}} = 41.04^\circ$ ,

12327 independent reflections [R(int) = 0.029], the final R was 0.0295 [I > 2s(I), 10255 data] and wR(F<sup>2</sup>) was 0.0702 (all data), GOF 1.061. CCDC deposit code 2291910.

**Table S1:** Selected distances (Å), angles (°) and dihedral angles (°) for (TBA)<sub>2</sub>[Mo<sub>2</sub>O<sub>7</sub>]

|                         |           |                 |           |
|-------------------------|-----------|-----------------|-----------|
| O(1)-Mo(1)              | 1.7321(7) | O(2)-Mo(1)      | 1.7357(8) |
| O(3)-Mo(1)#1            | 1.8962(3) | O(3)-Mo(1)      | 1.9862(3) |
| O(4)-Mo(1)              | 1.7270(7) |                 |           |
| Mo(1)#1-O(3)-Mo(1)      | 148.56(6) | O(4)-Mo(1)-O(1) | 108.62(4) |
| O(4)-Mo(1)-O(2)         | 110.35(4) | O(1)-Mo(1)-O(2) | 108.89(4) |
| O(4)-Mo(1)-O(3)         | 109.79(4) | O(1)-Mo(1)-O(3) | 109.52(3) |
| O(2)-Mo(1)-O(3)         | 109.65(3) |                 |           |
| Mo(1)#1-O(3)-Mo(1)-O(4) |           | 7.43(3)         |           |
| Mo(1)#1-O(3)-Mo(1)-O(1) |           | 126.61(3)       |           |
| Mo(1)#1-O(3)-Mo(1)-O(2) |           | -113.96(3)      |           |

Symmetry transformations used to generate equivalent atoms: (#1 -x+1/2,y,-z+1 )

## Mass spectrometry

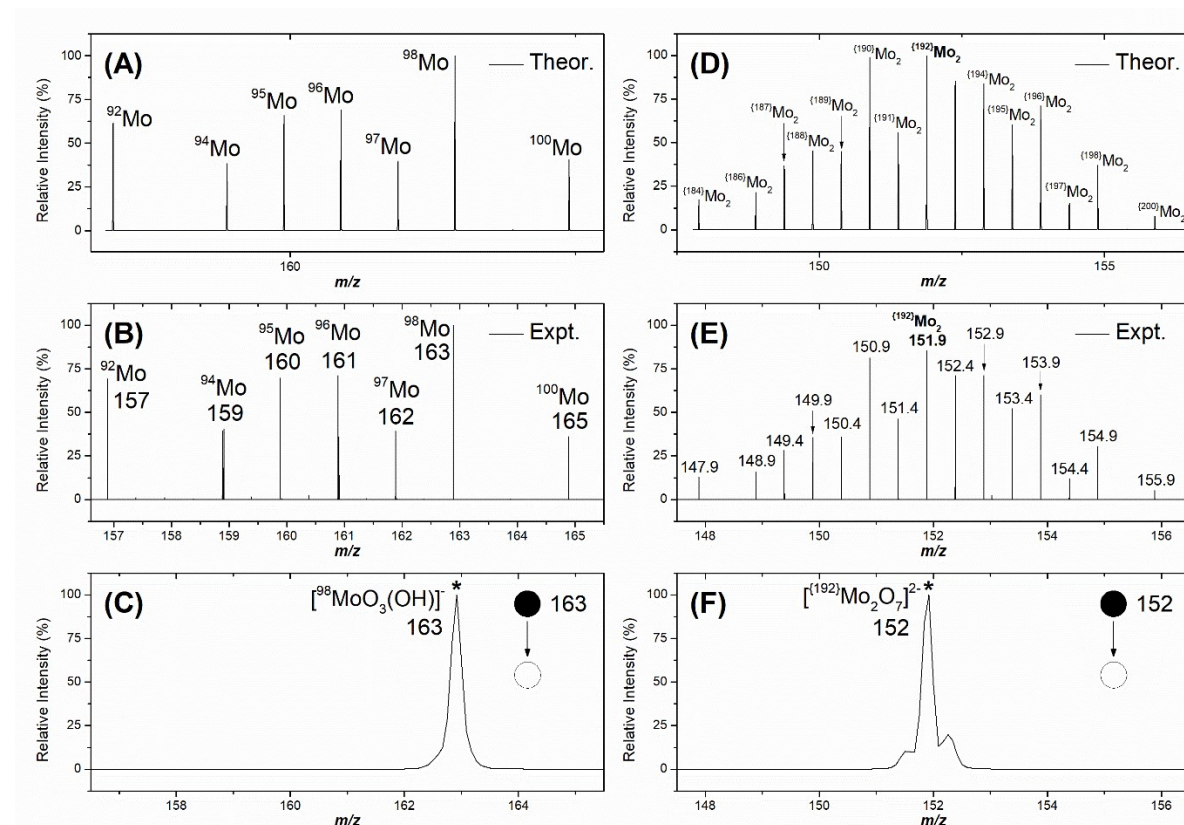

**Fig. S2** (A) Theoretical isotope pattern of [MoO<sub>3</sub>(OH)]<sup>-</sup>; (B) Orbitrap experimental isotope pattern of the ion assigned as [MoO<sub>3</sub>(OH)]<sup>-</sup>; (C) Mass selection of a single peak at *m/z* 163 in the ion trap which corresponds to [<sup>98</sup>MoO<sub>3</sub>(OH)]<sup>-</sup>; (D) Theoretical isotope pattern of [Mo<sub>2</sub>O<sub>7</sub>]<sup>2-</sup>; (E) Orbitrap experimental isotope pattern of the ion assigned as [Mo<sub>2</sub>O<sub>7</sub>]<sup>2-</sup>; Mass selection of a single peak at *m/z* 152 in the ion trap which corresponds to [<sup>192</sup>Mo<sub>2</sub>O<sub>7</sub>]<sup>2-</sup>.

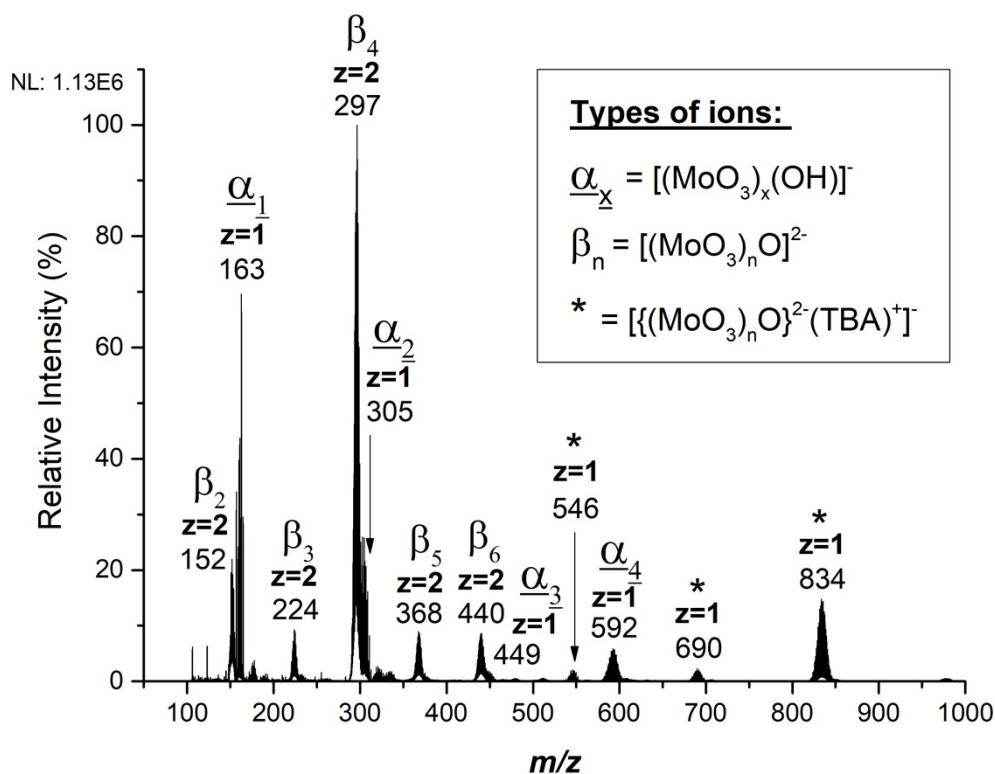

**Fig. S3** Negative ion mode ion trap ESI-MS of  $(\text{TBA})_2[\text{Mo}_2\text{O}_7]$  in acetonitrile showing the formation of several molybdate oxyanions.  $\alpha_x$  ions:  $[(\text{MoO}_3)_x(\text{OH})]^-$  ( $m/z$  163);  $[(\text{MoO}_3)_2(\text{OH})]^-$  ( $m/z$  305);  $[(\text{MoO}_3)_3(\text{OH})]^-$  ( $m/z$  449);  $[(\text{MoO}_3)_4(\text{OH})]^-$  ( $m/z$  593).  $\beta_n$  ions:  $[(\text{MoO}_3)_2\text{O}]^{2-}$  ( $m/z$  152);  $[(\text{MoO}_3)_3\text{O}]^{2-}$  ( $m/z$  224);  $[(\text{MoO}_3)_4\text{O}]^{2-}$  ( $m/z$  297);  $[(\text{MoO}_3)_5\text{O}]^{2-}$  ( $m/z$  368);  $[(\text{MoO}_3)_6\text{O}]^{2-}$  ( $m/z$  440). \* ions:  $[ \{ (\text{MoO}_3)_2\text{O} \}^{2-} (\text{TBA})^+ ]^-$  ( $m/z$  546);  $[ \{ (\text{MoO}_3)_3\text{O} \}^{2-} (\text{TBA})^+ ]^-$  ( $m/z$  690);  $[ \{ (\text{MoO}_3)_4\text{O} \}^{2-} (\text{TBA})^+ ]^-$  ( $m/z$  834). TBA = tetrabutylammonium, z represents the charge state of the anion.

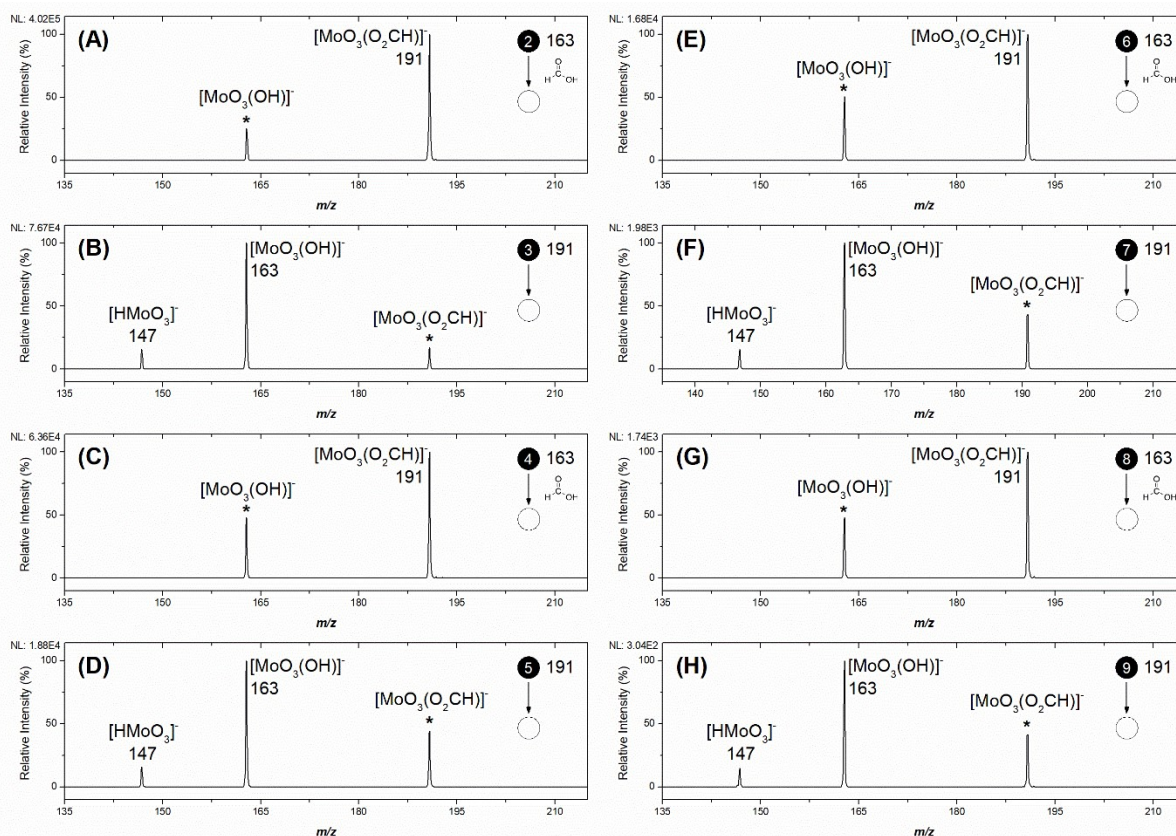

**Fig. S4** Multistage mass spectrometry ( $MS^n$ ) experiments demonstrating a two-step gas-phase catalytic cycle for the decomposition of formic acid (Scheme 1D). Ion-molecule reactions (IMR) of  $[MoO_3(OH)]^-$  ( $m/z$  163) with  $HCO_2H$  were obtained at the given activation times, collision-induced dissociation (CID) experiments on  $[MoO_3(O_2CH)]^-$  ( $m/z$  191) were obtained using a Q value of 0.25 and an activation time of 10 ms with the given Normalised Collision Energies (NCE): (A)  $MS^2$  IMR (at 1300 ms); (B)  $MS^3$  CID (NCE = 13%); (C)  $MS^4$  IMR (at 1200 ms); (D)  $MS^5$  CID (NCE = 12%); (E)  $MS^6$  IMR (at 1200 ms); (F)  $MS^7$  CID (NCE = 12%); (G)  $MS^8$  IMR (at 1200 ms); (H)  $MS^9$  CID (NCE = 12%). An asterisk (\*) denotes the mass selected precursor ion.

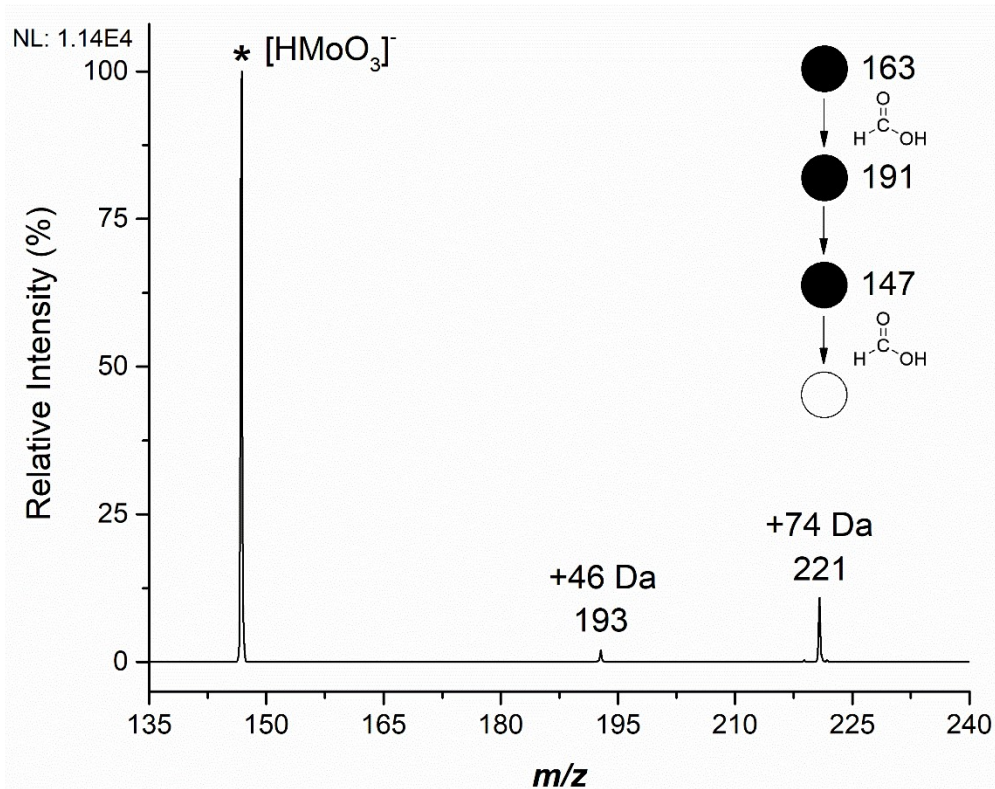

**Fig. S5** MS<sup>4</sup> IMR experiment of  $[\text{HMoO}_3]^-$  ( $m/z$  147) with  $\text{HCO}_2\text{H}$  ( $[\text{HCO}_2\text{H}]_{\text{ion trap}} = 9.2 \times 10^9$  molecules  $\text{cm}^{-3}$ ) at an activation time of 10,000 ms. An asterisk (\*) denotes the mass selected precursor ion.

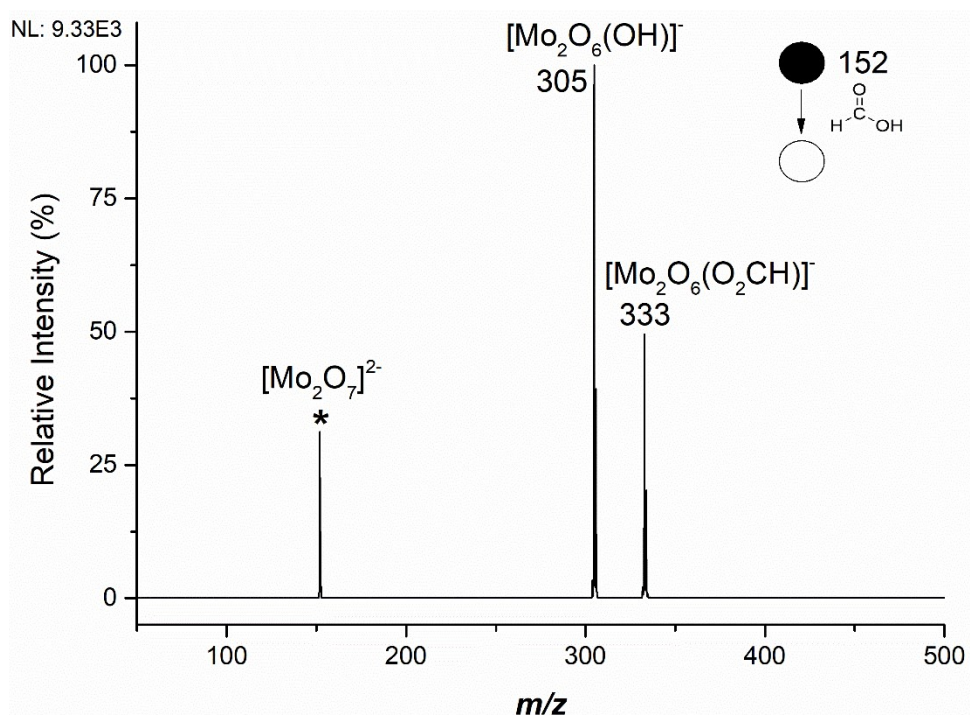

**Fig. S6** MS<sup>2</sup> IMR on  $[\text{Mo}_2\text{O}_7]^{2-}$  ( $m/z$  152) with  $\text{HCO}_2\text{H}$  showing the formation of the primary product ion  $[\text{Mo}_2\text{O}_6(\text{OH})]^-$  ( $m/z$  305) and the secondary product ion  $[\text{Mo}_2\text{O}_6(\text{O}_2\text{CH})]^-$  ( $m/z$  333). The formate anion  $\text{HCO}_2^-$  ( $m/z$  45), which is the other product ion formed upon protonation of  $[\text{Mo}_2\text{O}_7]^{2-}$  by  $\text{HCO}_2\text{H}$ , is not experimentally observed due to the low mass cut-off of the ion trap.

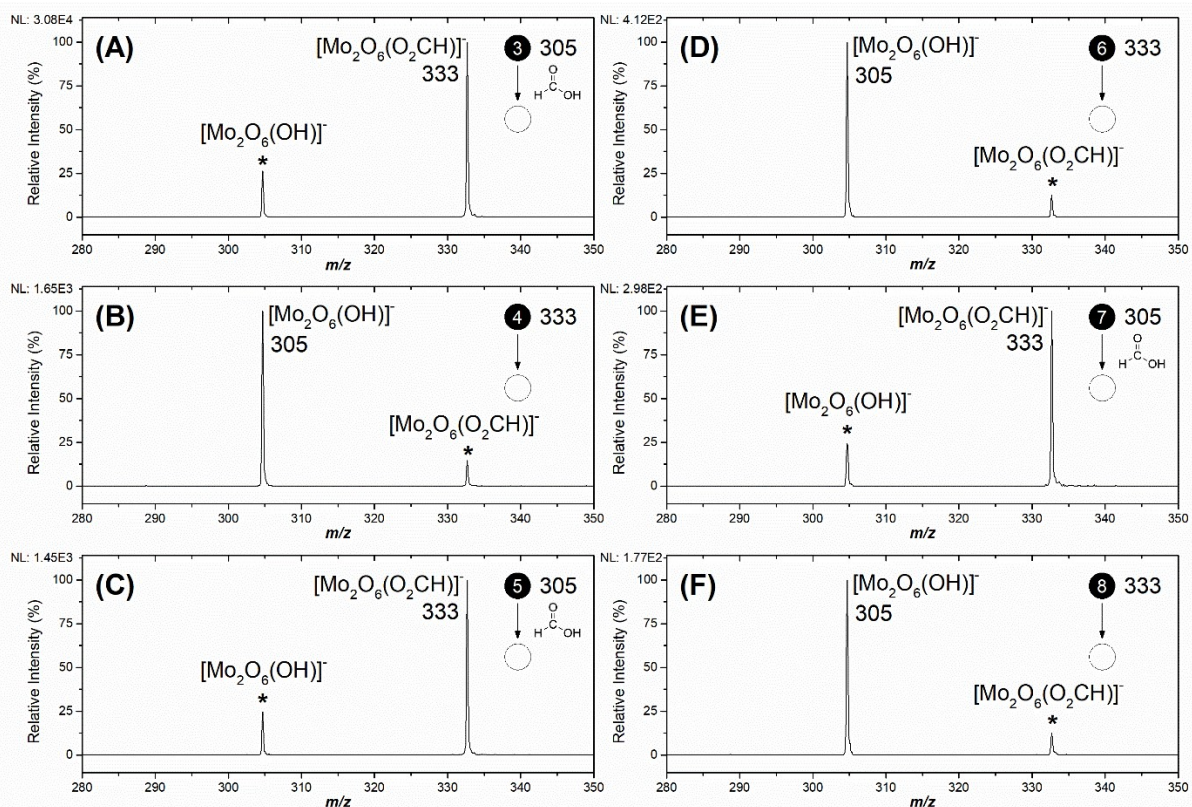

**Fig. S7** Multistage mass spectrometry ( $MS^n$ ) experiments on  $[Mo_2O_6(O_2CH)]^-$  demonstrating a two-step gas-phase catalytic cycle for the selective decomposition of formic acid. Ion-molecule reactions (IMR) of  $[Mo_2O_6(OH)]^-$  ( $m/z$  305) with  $HCO_2H$  were obtained at the given activation times, collision-induced dissociation (CID) experiments on  $[Mo_2O_6(O_2CH)]^-$  ( $m/z$  333) were obtained using a  $Q$  value of 0.25 and an activation time of 10 ms with the given Normalised Collision Energies (NCE): (A)  $MS^3$  IMR (at 200 ms); (B)  $MS^4$  CID (NCE = 8%); (C)  $MS^5$  IMR (at 200 ms); (D)  $MS^6$  CID (NCE = 8%); (E)  $MS^7$  IMR (at 200 ms); (F)  $MS^8$  CID (NCE = 8%). An asterisk (\*) denotes the mass selected precursor ion.

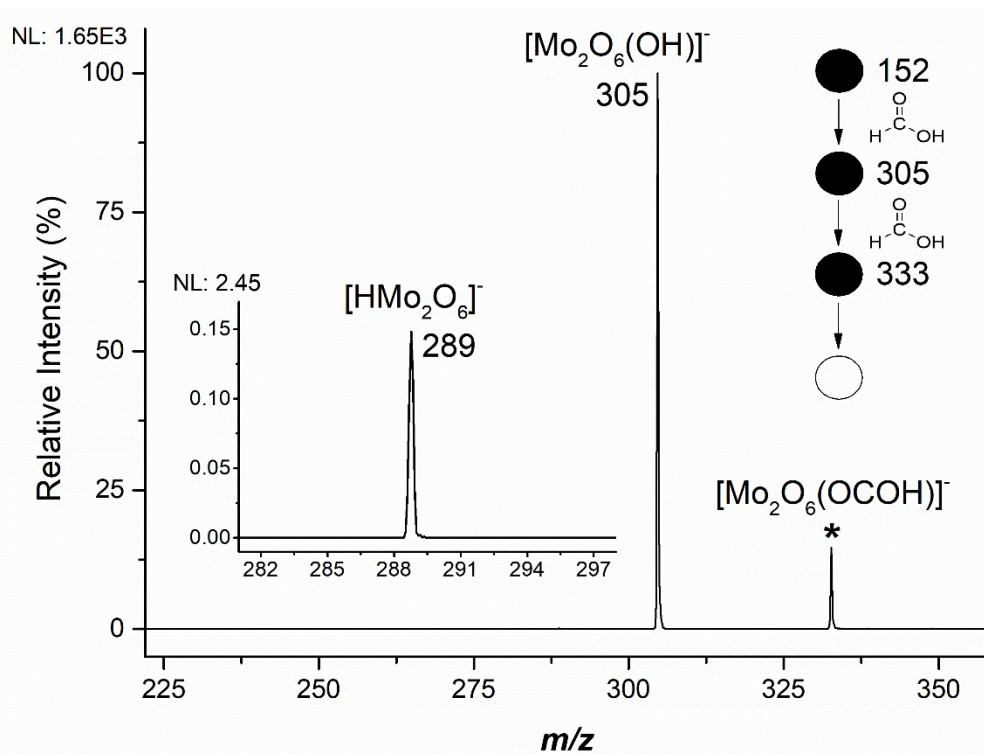

**Fig. S8** MS<sup>4</sup> CID experiment of  $[\text{Mo}_2\text{O}_6(\text{O}_2\text{CH})]^-$  (*m/z* 333) illustrating decarbonylation, to produce  $[\text{Mo}_2\text{O}_6(\text{OH})]^-$  (*m/z* 305) as the major product ion, is preferred over decarboxylation to produce  $[\text{HMo}_2\text{O}_6]^-$  (*m/z* 289) as a minor product ion. Spectrum obtained using a Q value of 0.25, an activation time of 10 ms and at an NCE of 8%. An asterisk (\*) denotes the mass selected precursor ion.

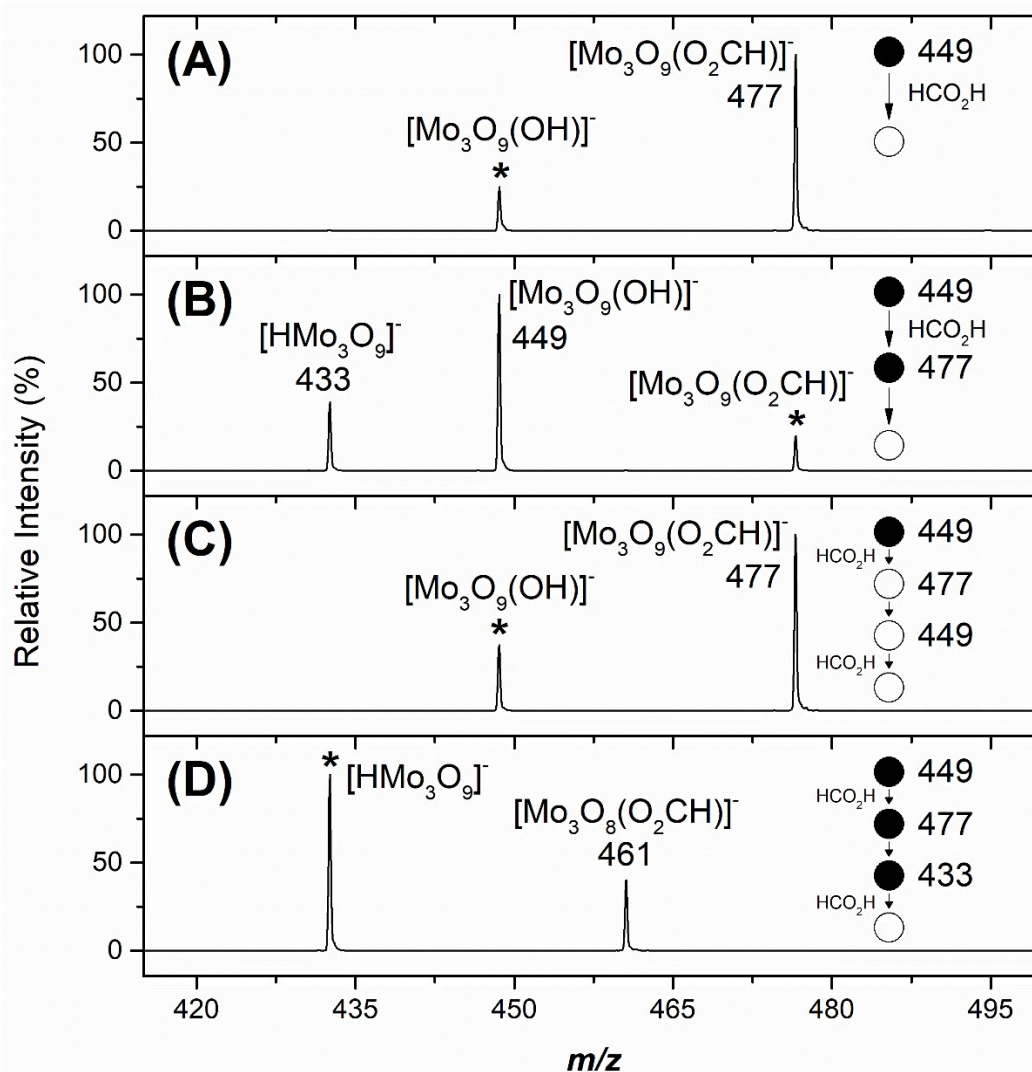

**Fig. S9** Multistage mass spectrometry ( $MS^n$ ) experiments on  $[Mo_3O_9(O_2CH)]^-$  demonstrating a two-step gas-phase catalytic cycle for the decomposition of formic acid. (A)  $MS^2$  IMR of  $[Mo_3O_9(OH)]^-$  ( $m/z$  449) with  $HCO_2H$  at an activation time of 300 ms; (B)  $MS^3$  CID of  $[Mo_3O_9(O_2CH)]^-$  ( $m/z$  477) obtained using an activation Q of 0.25, an activation time of 10 ms and a Normalised Collision Energy (NCE) of 8.5%; (C)  $MS^4$  IMR of  $[Mo_3O_9(OH)]^-$  ( $m/z$  449) with  $HCO_2H$  at an activation time of 200 ms; (D)  $MS^4$  IMR of  $[HMo_3O_9]^-$  ( $m/z$  433) with  $HCO_2H$  at an activation time of 100 ms. An asterisk (\*) denotes the mass selected precursor ion.



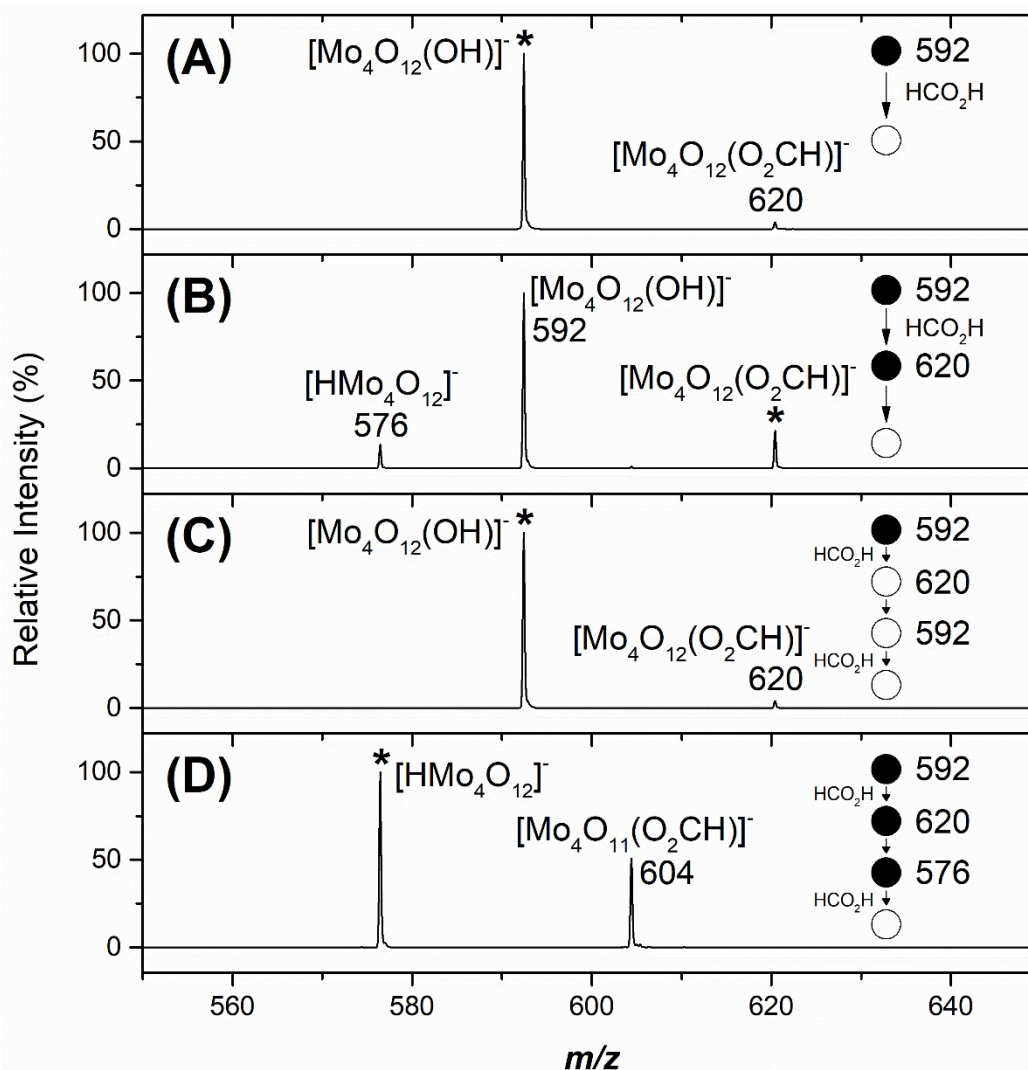

**Fig. S10** Multistage mass spectrometry (MS<sup>n</sup>) experiments on [Mo<sub>4</sub>O<sub>12</sub>(O<sub>2</sub>CH)]<sup>-</sup> demonstrating a two-step gas-phase catalytic cycle for the decomposition of formic acid. (A) MS<sup>2</sup> IMR of [Mo<sub>4</sub>O<sub>12</sub>(OH)]<sup>-</sup> (*m/z* 592) with HCO<sub>2</sub>H at an activation time of 5000 ms; (B) MS<sup>3</sup> CID of [Mo<sub>4</sub>O<sub>12</sub>(O<sub>2</sub>CH)]<sup>-</sup> (*m/z* 620) obtained using an activation Q of 0.25, an activation time of 10 ms and a Normalised Collision Energy (NCE) of 7.5%; (C) MS<sup>4</sup> IMR of [Mo<sub>4</sub>O<sub>12</sub>(OH)]<sup>-</sup> (*m/z* 592) with HCO<sub>2</sub>H at an activation time of 5000 ms; (D) MS<sup>4</sup> IMR of [HMo<sub>4</sub>O<sub>12</sub>]<sup>-</sup> (*m/z* 576) with HCO<sub>2</sub>H at an activation time of 30 ms. An asterisk (\*) denotes the mass selected precursor ion.

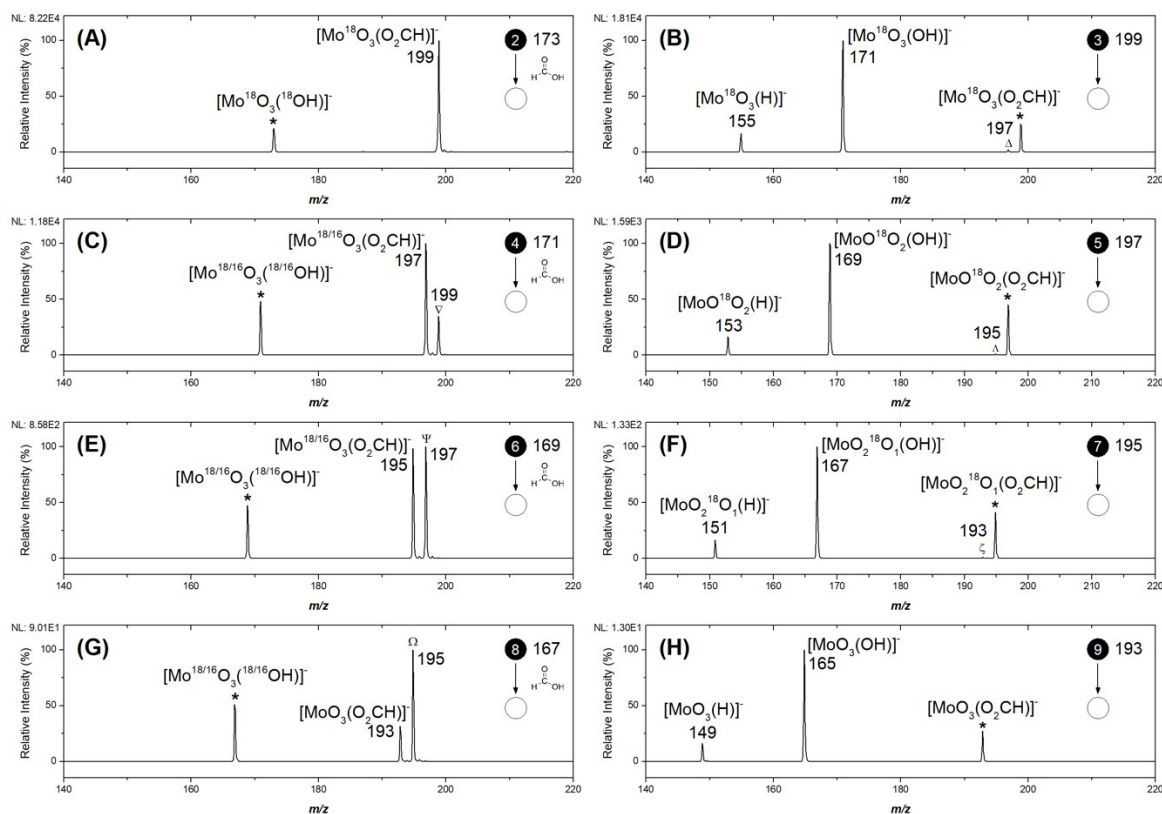

**Fig. S11** Multistage mass spectrometry ( $MS^n$ ) experiments on  $^{18}O$ -labelled molybdate anions. Ion-molecule reactions (IMR) of  $[^{100}Mo^{18/16}O_3(^{18/16}OH)]^-$  with  $HCO_2H$  were obtained at the given activation times, collision-induced dissociation (CID) experiments on  $[^{100}Mo^{18/16}O_3(O_2CH)]^-$  were obtained using a Q value of 0.25 and an activation time of 10 ms with the given Normalised Collision Energies (NCE): (A)  $MS^2$  IMR on  $[^{100}Mo^{18}O_3(^{18}OH)]^-$  ( $m/z$  173) at 500 ms; (B)  $MS^3$  CID of  $[^{100}Mo^{18}O_3(O_2CH)]^-$  ( $m/z$  199) (NCE = 16%). ( $\Delta$ ) denotes a secondary product ion corresponding to  $[^{100}MoO^{18}O_2(O_2CH)]^-$  ( $m/z$  197); (C)  $MS^4$  IMR on  $^{18}O/^{16}O$  scrambled  $[^{100}Mo^{18/16}O_3(^{18/16}OH)]^-$  ( $m/z$  171) at 400 ms. ( $\Lambda$ ) corresponds to  $[^{100}Mo^{18}O_3(O_2CH)]^-$  ( $m/z$  199); (D)  $MS^5$  CID of  $[^{100}MoO^{18}O_2(O_2CH)]^-$  ( $m/z$  197) (NCE = 15%). ( $\Lambda$ ) denotes a secondary product ion corresponding to  $[^{100}MoO_2^{18}O_1(O_2CH)]^-$  ( $m/z$  195); (E)  $MS^6$  IMR on  $[^{100}Mo^{18/16}O_3(^{18/16}OH)]^-$  ( $m/z$  169) at 500 ms. ( $\Psi$ ) corresponds to  $[^{100}MoO^{18}O_2(O_2CH)]^-$  ( $m/z$  197); (F)  $MS^7$  CID of  $[^{100}MoO_2^{18}O_1(O_2CH)]^-$  ( $m/z$  195) (NCE = 15%). ( $\zeta$ ) denotes a secondary product ion corresponding to  $[^{100}MoO_3(O_2CH)]^-$  ( $m/z$  193); (G)  $MS^7$  IMR on  $[^{100}Mo^{18/16}O_3(^{18/16}OH)]^-$  ( $m/z$  167) at 400 ms. ( $\Omega$ ) corresponds to  $[^{100}MoO_2^{18}O_1(O_2CH)]^-$  ( $m/z$  195); (H)  $MS^9$  CID of  $[^{100}MoO_3(O_2CH)]^-$  ( $m/z$  193) (NCE = 16%). An asterisk (\*) denotes the mass selected precursor ion.

Equations associated with sequential  $^{18}\text{O}/^{16}\text{O}$  scrambling found in Fig. S11.

## Fig. S11D:

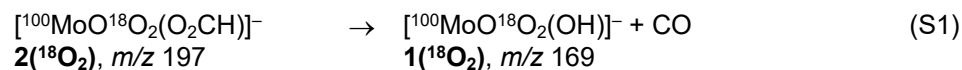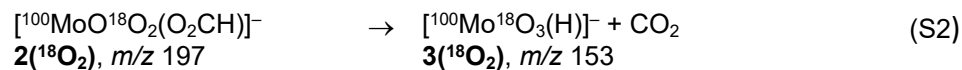

## Fig. S11E:

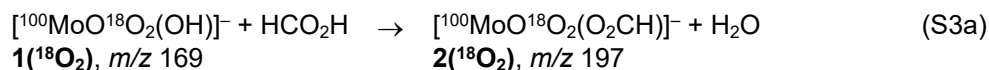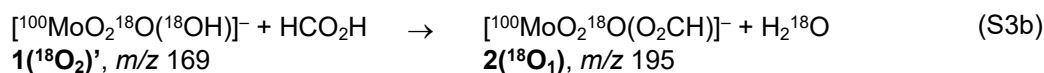

## Fig. S11F:

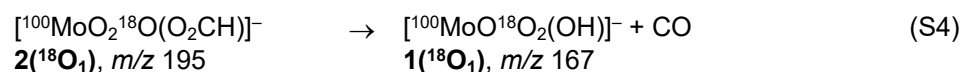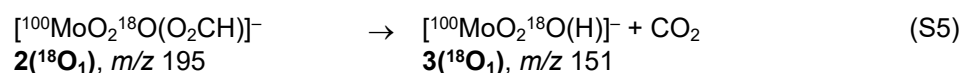

## Fig. S11G:

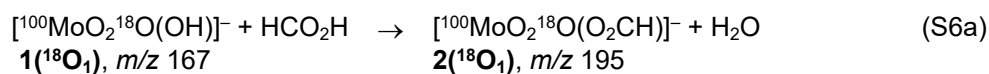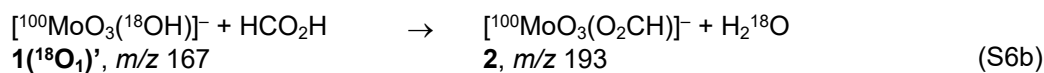

## Fig. S11H: (note: same as eqs 5 and 6, but with different Mo isotope).

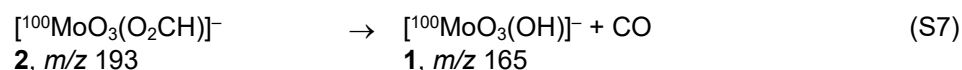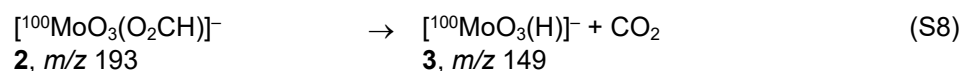

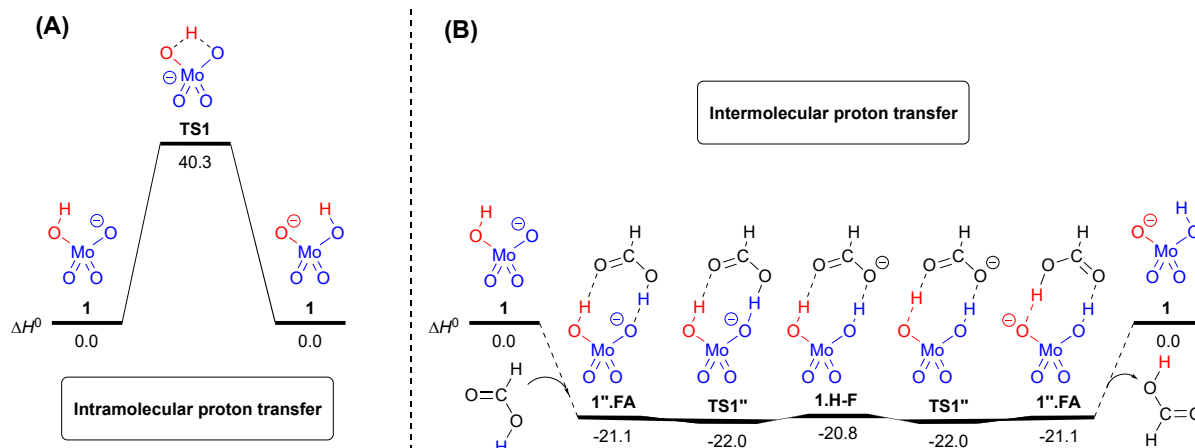

**Fig. S12** DFT calculated energy diagrams relevant to the <sup>18</sup>O/<sup>16</sup>O scrambling pathways: (A) intramolecular proton transfer pathway (eq. 17); (B) intermolecular proton transfer pathway (eq. 18). The relative enthalpies ( $\Delta H^0$  (0 K)) are given in kcal mol<sup>-1</sup> and are calculated at the  $\omega$ B97M-D3(BJ)/def2-QZVPP// $\omega$ B97XD/def2-TZVP level of theory.

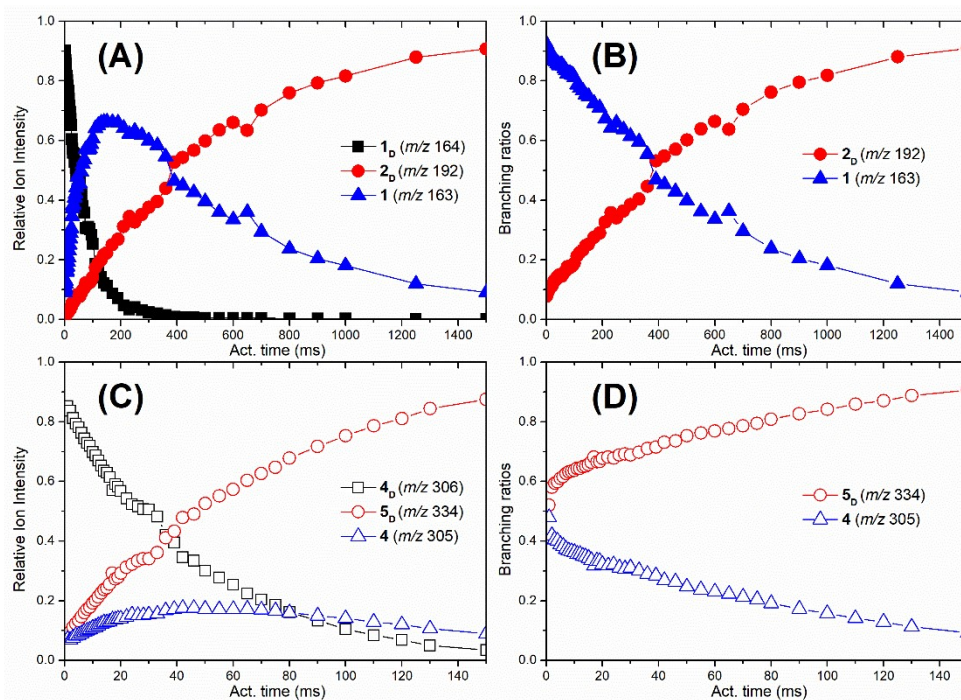

**Fig. S13** Kinetic plots for the multistage mass spectrometry ion-molecule reaction experiments (MS<sup>n</sup> IMR) on [(MoO<sub>3</sub>)<sub>x</sub>(OD)]<sup>-</sup> (*x* = 1 – 2) with *d*<sub>1</sub>-formic acid (DCO<sub>2</sub>H) ([DCO<sub>2</sub>H] ion trap = 3.6 × 10<sup>10</sup> molecule cm<sup>-3</sup>). (A) Kinetic curve for the MS<sup>4</sup> IMR of [MoO<sub>3</sub>(OD)]<sup>-</sup> (1<sub>D</sub>, *m/z* 164) showing depletion of 1<sub>D</sub> (black squares, closed) and product ion formation *via* dehydration (2<sub>D</sub>, red circles, closed) and H/D exchange (1, blue triangles, closed); (B) Normalised branching ratios for the product ions 2<sub>D</sub> and 1 observed in (A); (C) Kinetic curve for the MS<sup>5</sup> IMR of [Mo<sub>2</sub>O<sub>6</sub>(OD)]<sup>-</sup> (4<sub>D</sub>, *m/z* 306) showing depletion of 4<sub>D</sub> (black squares, open) and product ion formation *via* dehydration (5<sub>D</sub>, red circles, open) and H/D exchange (4, blue triangles, open); (D) Normalised branching ratios for the product ions 5<sub>D</sub> and 4 observed in (C). Each point represents the intensity of the ion peaks as a proportion of the total product ion intensity at various activation times (ms).

**Table S2:** Benchmarking of various levels of theory to best reproduce the energies for decomposition of formic acid *via* dehydrogenation ( $\text{H}_2 + \text{CO}_2$ ) and decarbonylation ( $\text{H}_2\text{O} + \text{CO}$ ). Standard heats of formation obtained from NIST Chemistry WebBook. All relative enthalpy ( $\Delta H$ ) values are given in kcal mol<sup>-1</sup>.

|                                                                      | Dehydrogenation ( $\text{H}_2 + \text{CO}_2$ ) | Decarbonylation ( $\text{H}_2\text{O} + \text{CO}$ ) |
|----------------------------------------------------------------------|------------------------------------------------|------------------------------------------------------|
| Standard heats of formation                                          | -3.5                                           | 6.3                                                  |
| $\omega\text{B97XD/def2-TZVPP}$                                      | -3.4                                           | 11.7                                                 |
| $\omega\text{B97M-D3(BJ)/def2-QZVPP//}\omega\text{B97XD/def2-TZVPP}$ | -2.8                                           | 6.8                                                  |
| $\text{PWPB95-D3(BJ)/def2-QZVPP//}\omega\text{B97XD/def2-TZVPP}$     | -4.9                                           | 9.4                                                  |
| $\text{DSD-PBEP86-D3(BJ)/def2-QZVPP//}\omega\text{B97XD/def2-TZVPP}$ | -4.3                                           | 9.3                                                  |

### Discussion on alternative mechanisms for reaction (4) involving protonation of an oxo ligand.

Proton transfer from formic acid to the oxo-ligand of  $[\text{MoO}_3(\text{OH})]^-$ , **1**, proceeds *via* **TS1-15a** (Fig. S14). Following the imaginary mode in one direction gives the five-coordinate complex  $[(\text{HCO}_2)\text{Mo}(\text{O})_2(\text{OH})_2]^-$ , **15a**, where the formate,  $\text{HCO}_2^-$ , is bound to the Mo(VI) center. Following the imaginary mode in the other direction shows the formation of an initial ion-molecule complex, **1.FA'**, where the acidic proton of formic acid is hydrogen bonding to the oxo-ligand to be protonated. We have not been able to optimize the structure of **1.FA'** as an energy minimum however linear potential energy surface (PES) scans (Fig. S16) indicate its formation as formic acid,  $\text{HCO}_2\text{H}$ , and  $[\text{MoO}_3(\text{OH})]^-$ , **1**, come together in an ion-molecule reaction. The estimated activation barrier for the proton transfer in **TS1-15a** is  $\Delta H^{0\ddagger} + 7.5$  kcal mol<sup>-1</sup>. Compared to protonation of the hydroxo-ligand (Fig. 5), a similar activation barrier is observed for **TS1-2** of  $\Delta H^{0\ddagger} + 7.7$  kcal mol<sup>-1</sup>. However, we note that the overall  $\Delta H^0$  of **TS1-15a** (-12.2 kcal mol<sup>-1</sup>) is lower than that of **TS1-2** (-8.2 kcal mol<sup>-1</sup>).

Upon formation of the five-coordinate  $[(\text{HCO}_2)\text{Mo}(\text{O})_2(\text{OH})_2]^-$ , **15a**, elimination of water can proceed *via* several similar pathways to give  $[\text{MoO}_3(\text{O}_2\text{CH})]^-$ , **2**, as observed in the MS-IMR experiments. These pathways are summarized in Fig. S14-S15 and described briefly here.

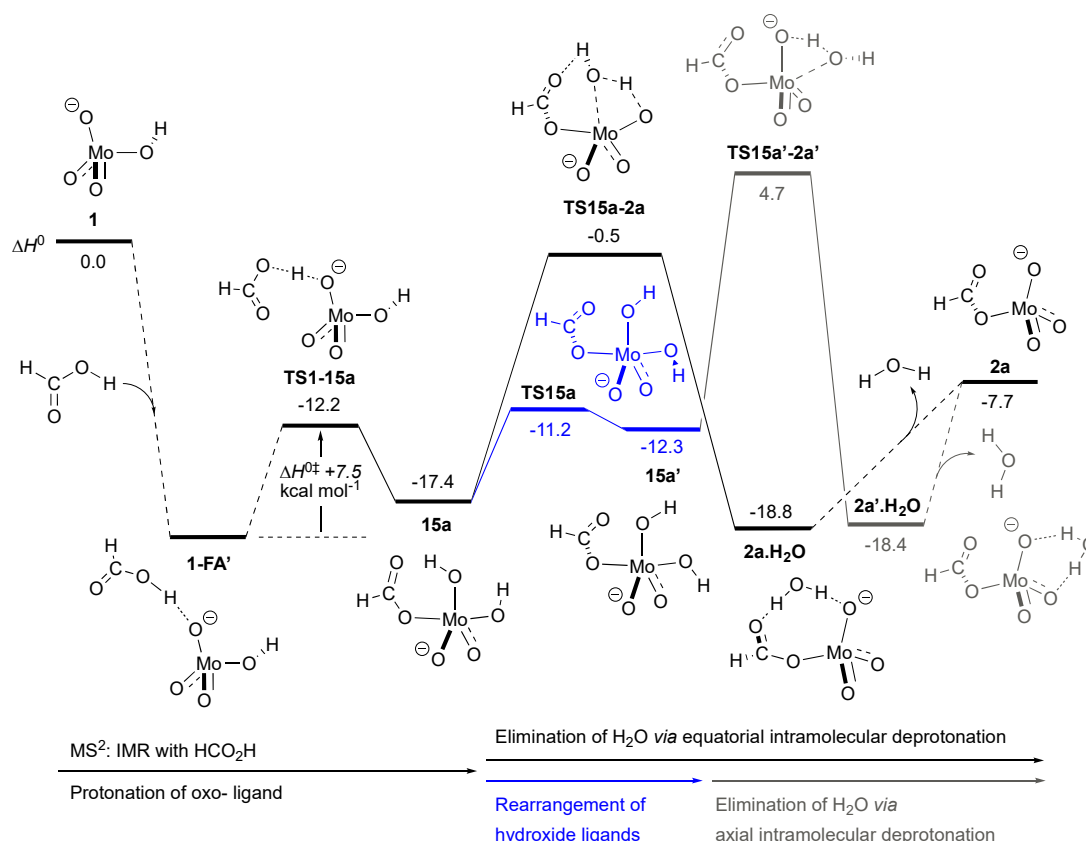

**Fig. S14** DFT calculated energy surface for the ion-molecule reaction of  $[\text{MoO}_3(\text{OH})]^-$  with  $\text{HCO}_2\text{H}$ . Protonation at an oxo- ligand followed by the elimination of water *via* intramolecular deprotonation. Elimination of water from equatorial position (black). Rearrangement of hydroxide ligands (blue) followed by elimination of water from an axial position (gray). The relative enthalpies  $\Delta H^0$  (0 K) are given in  $\text{kcal mol}^{-1}$  and are calculated at the  $\omega\text{B97M-D3(BJ)/def2-QZVPP//}\omega\text{B97XD/def2-TZVPP}$  level of theory.

The most energetically favorable pathway found occurs through an equatorial displacement of  $\text{H}_2\text{O}$  from **15a** through **TS15a-2a** ( $\Delta H^0 = -0.5 \text{ kcal mol}^{-1}$ ). Deprotonation of the hydroxide in the axial position of **15a** and attack of the equatorial hydroxide **TS15a-12a** ( $\Delta H^{0\dagger} = +16.9 \text{ kcal mol}^{-1}$ ) results in the formation of  $\text{H}_2\text{O}$  in the hydrogen bonded ion-molecule complex  $[\text{MoO}_3(\text{O}_2\text{CH})\cdot\text{H}_2\text{O}]^-$ , **2a.H<sub>2</sub>O**, akin to what was observed in Fig. 5. Removal of  $\text{H}_2\text{O}$  results in **2a**. Alternatively, the hydroxide ligands in **15a** can undergo a rearrangement *via* **TS15a** to give **15a'** where the hydroxide ligands are set up to undergo water elimination from an axial position (**TS15a'-2a'**). This gives the ion-molecule complex **2a'.H<sub>2</sub>O** which is an isomer of **2a.H<sub>2</sub>O** where the  $\text{H}_2\text{O}$  is bound to **2a** in a different position. We note that the difference in energies between **2a.H<sub>2</sub>O** and **2a'.H<sub>2</sub>O** are minor. The key transition state barrier for this channel is *ca.*  $5.2 \text{ kcal mol}^{-1}$  higher in energy than elimination of  $\text{H}_2\text{O}$  *via* equatorial intramolecular deprotonation.

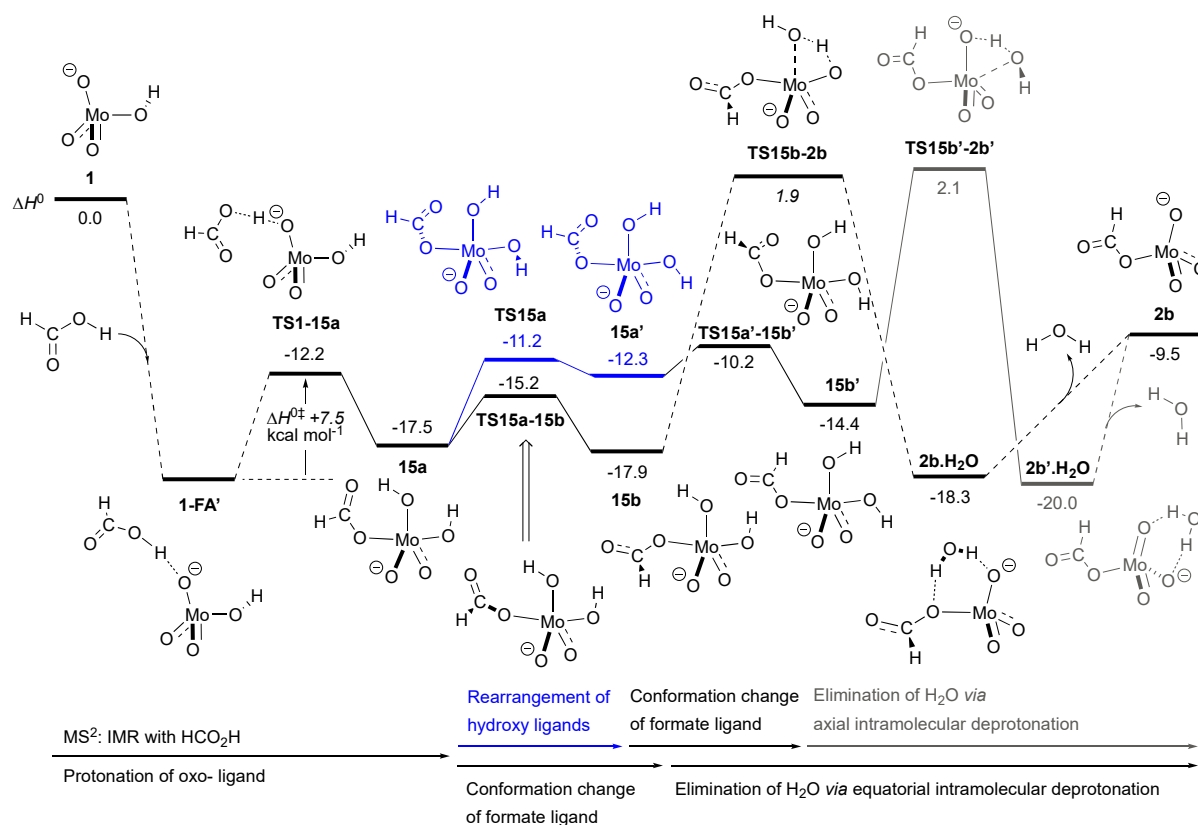

**Fig. S15** DFT calculated energy surface for the ion-molecule reaction of  $[\text{MoO}_3(\text{OH})]^-$  with  $\text{HCO}_2\text{H}$ . Protonation at an oxo- ligand followed by the elimination of water *via* intramolecular deprotonation. The relative enthalpies  $\Delta H^0$  (0 K) are given in kcal mol<sup>-1</sup> and are calculated at the  $\omega\text{B97M-D3(BJ)}/\text{def2-QZVPP}/\omega\text{B97XD}/\text{def2-TZVPP}$  level of theory.

Fig. S15 summarizes several pathways possible for the elimination of water *via* intramolecular deprotonation to give the conformer  $[\text{MoO}_3(\text{O}_2\text{CH})]^-$ , **2b**. These pathways mirror those presented in Fig. S14 and as such will be discussed in lesser detail. However, all appear to connect to **15a** as a key intermediate that is initially formed in the IMR with  $\text{HCO}_2\text{H}$ . A conformational change of the formate ligand *via* **TS15a-15b** ( $\Delta H^{\ddagger} = +2.2$  kcal mol<sup>-1</sup>) gives **15b** where the C1-proton of the formate ligand is now hydrogen bonded to one of the oxo- ligands. Elimination of water from the equatorial position *via* intramolecular deprotonation occurs through **TS15b-2b** to give **2b.H<sub>2</sub>O**. We have not been able to locate an optimized structure for **TS15b-2b** and have estimated the relative  $\Delta H^0$  based on the linear PES scan shown below (Fig. S17). Removal of H<sub>2</sub>O from **2b.H<sub>2</sub>O** gives **2b**. Alternatively, the hydroxide ligands in **15a** can undergo a rearrangement first, *via* **TS15a** to give **15a'**, prior to the conformational change of the formate ligand resulting in **15b'** where now the C1-proton of the formate ligand is hydrogen bonding to one of the hydroxide- ligands. Water is then eliminated from the axial position of **15b'** to give **2b'.H<sub>2</sub>O**.

Whilst the key transition states found for the elimination of water only differ by a few kcal mol<sup>-1</sup>, only the pathway found occurring through **TS15a-2a** is below the 'zero' energy. Moreover, this remains greater than the key transition state barrier **TS1-2** observed in Fig. 5 for protonation of the coordinated hydroxide by formic acid and elimination of H<sub>2</sub>O. So while the initial protonation of an oxo-ligand may be lower in energy, the subsequent rearrangements required prior to elimination from **15a** presents a significant barriers.

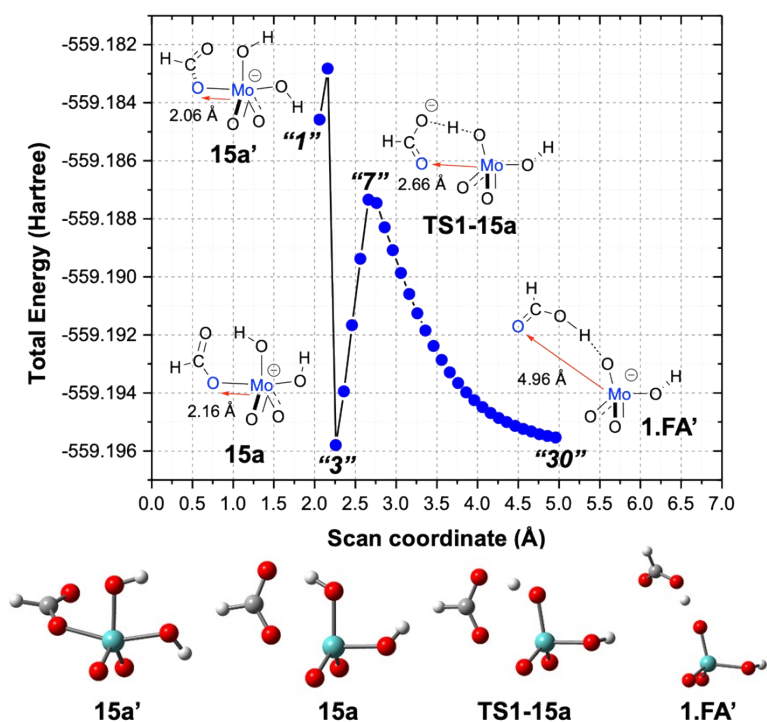

**Fig. S16** Linear potential energy surface (PES) scan along Mo-O bond (increasing). Structure "1" corresponds to **15a'** (Fig. S14); Structure "3" corresponds to **15a** (Fig. S14); Structure "7" corresponds to **TS1-15a** (Fig. S14); Structure "30" corresponds to **1.FA'** (Fig. S14).



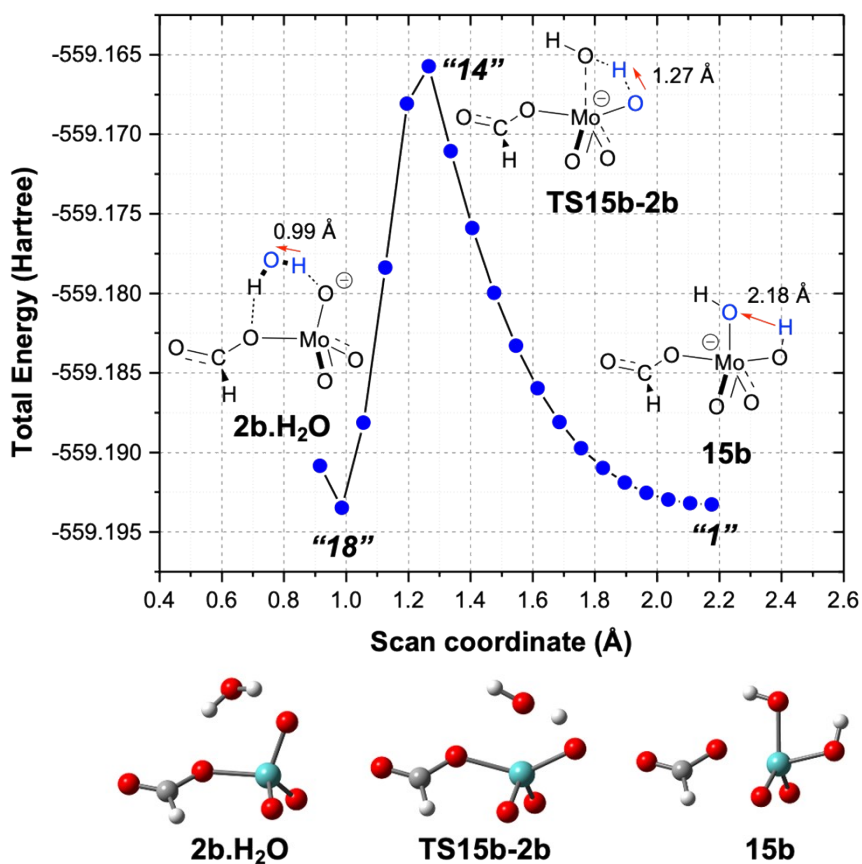

**Fig. S17** Linear potential energy surface (PES) scan along O-H bond (decreasing) showing the elimination of water from equatorial intramolecular deprotonation to give **2b.H<sub>2</sub>O** (Fig. S15). Structure "1" corresponds to **15b** (Fig. S15); Structure "14" corresponds to **TS15b-2b** (Fig. S15); Structure "18" corresponds to **2b.H<sub>2</sub>O** (Fig. S15).

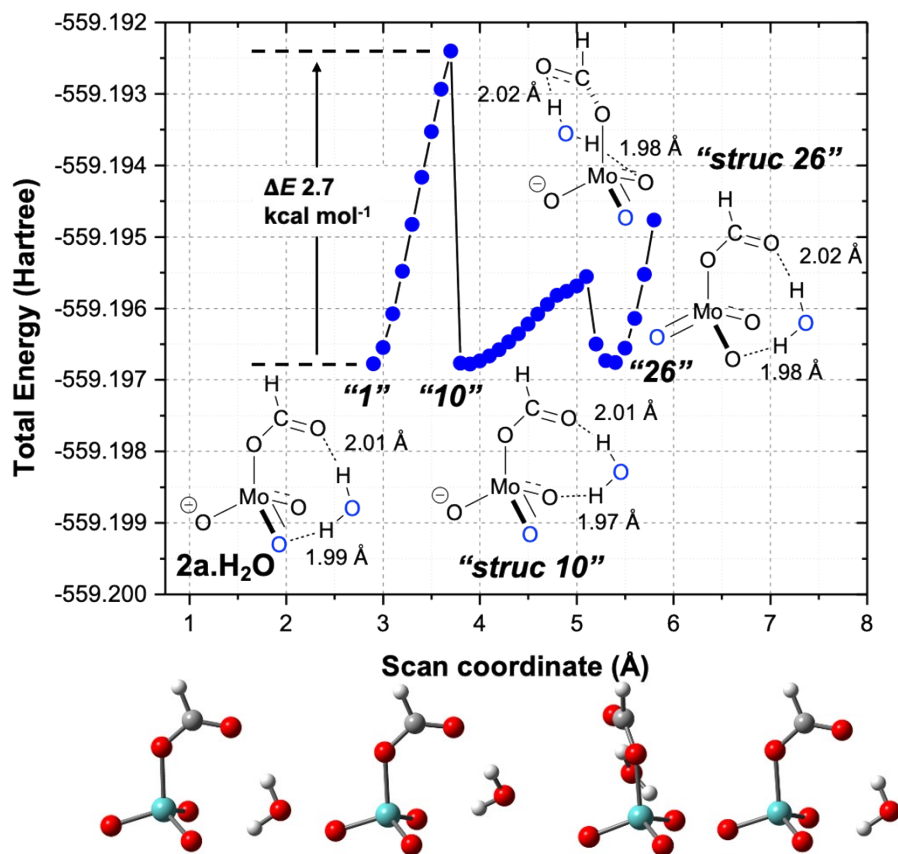

**Fig. S18** Linear potential energy surface (PES) scan along O-O bond (increasing). Structure "1" corresponds to **2a.H<sub>2</sub>O** (Fig. 5 and S14).

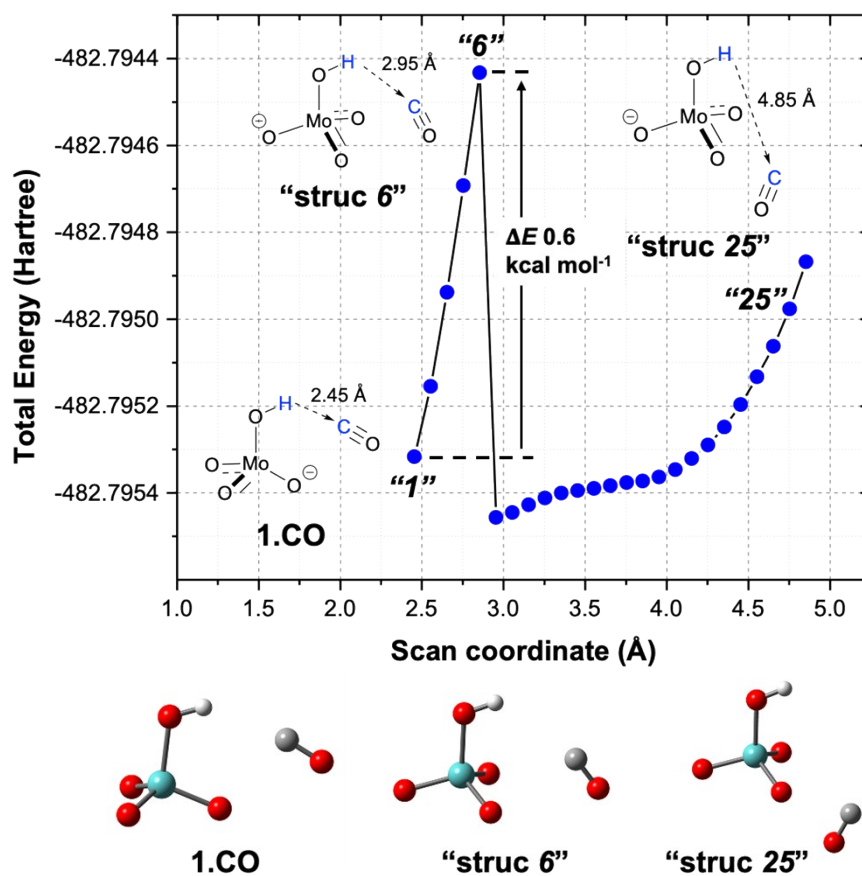

**Fig. S19** Linear potential energy surface (PES) scan along H-C bond (increasing). Structure "1" corresponds to **1.CO** (Fig. 5).

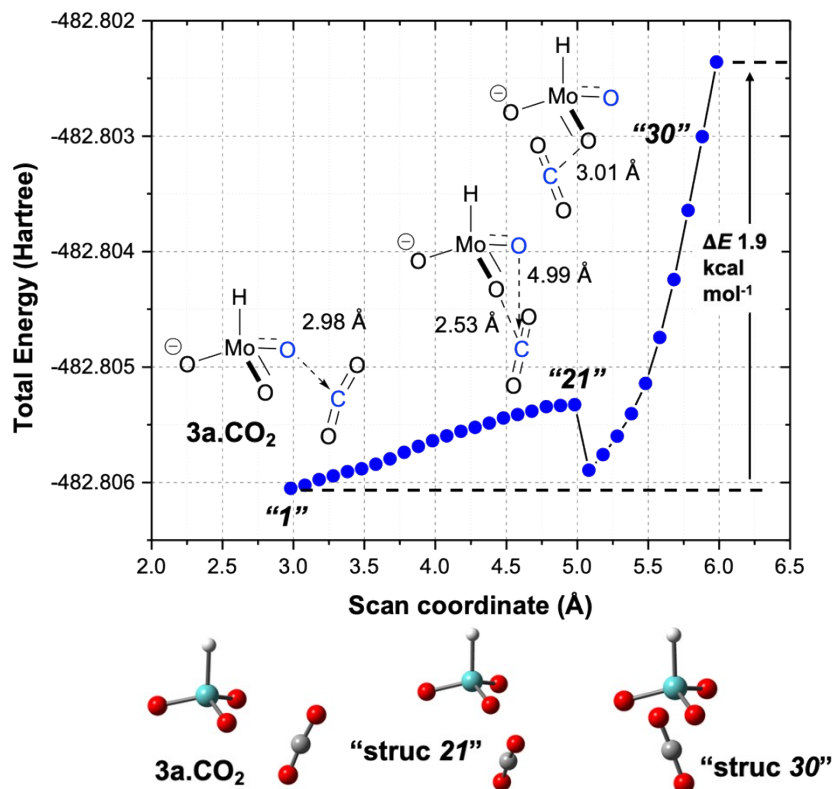

**Fig. S20** Linear potential energy surface (PES) scan along O-C bond (increasing). Structure “1” corresponds to **3a.CO<sub>2</sub>** (Fig. 5).

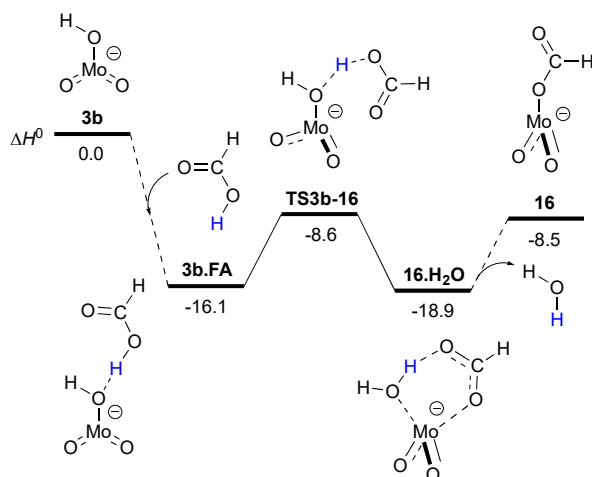

**Fig. S21** DFT calculated energy surface for the reaction between  $[\text{MoO}_2(\text{OH})]^-$ , **3b**, and  $\text{HCO}_2\text{H}$ . The relative enthalpies ( $\Delta H^0$  (0 K)) are given in  $\text{kcal mol}^{-1}$  and are calculated at the  $\omega\text{B97M-D3(BJ)/def2-QZVPP//}\omega\text{B97XD/def2-TZVP}$  level of theory.

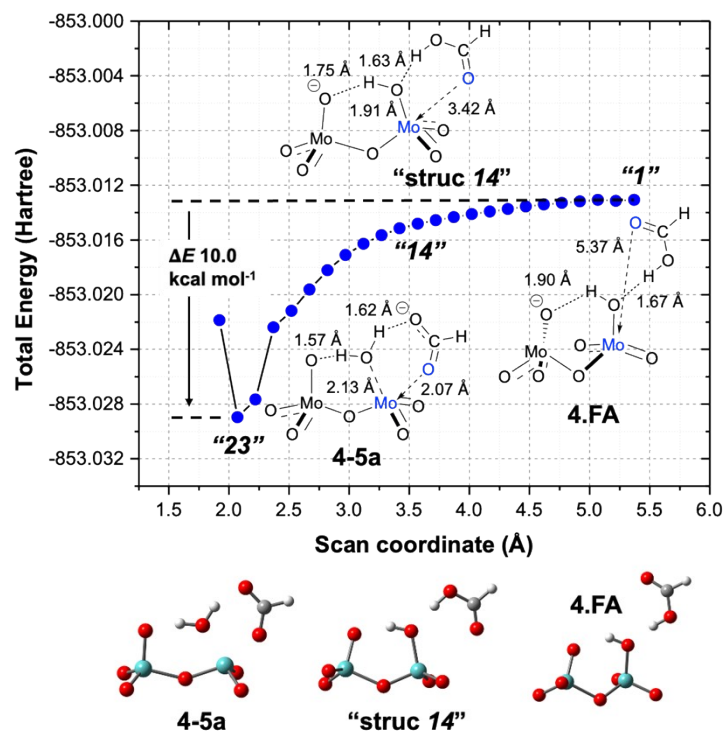

**Fig. S22** Linear potential energy surface (PES) scan along the O(formate)-Mo bond (decreasing). Structure "1" corresponds to **4.FA** (Fig. 6); Structure "23" corresponds to **4-5a** (Fig. 6).

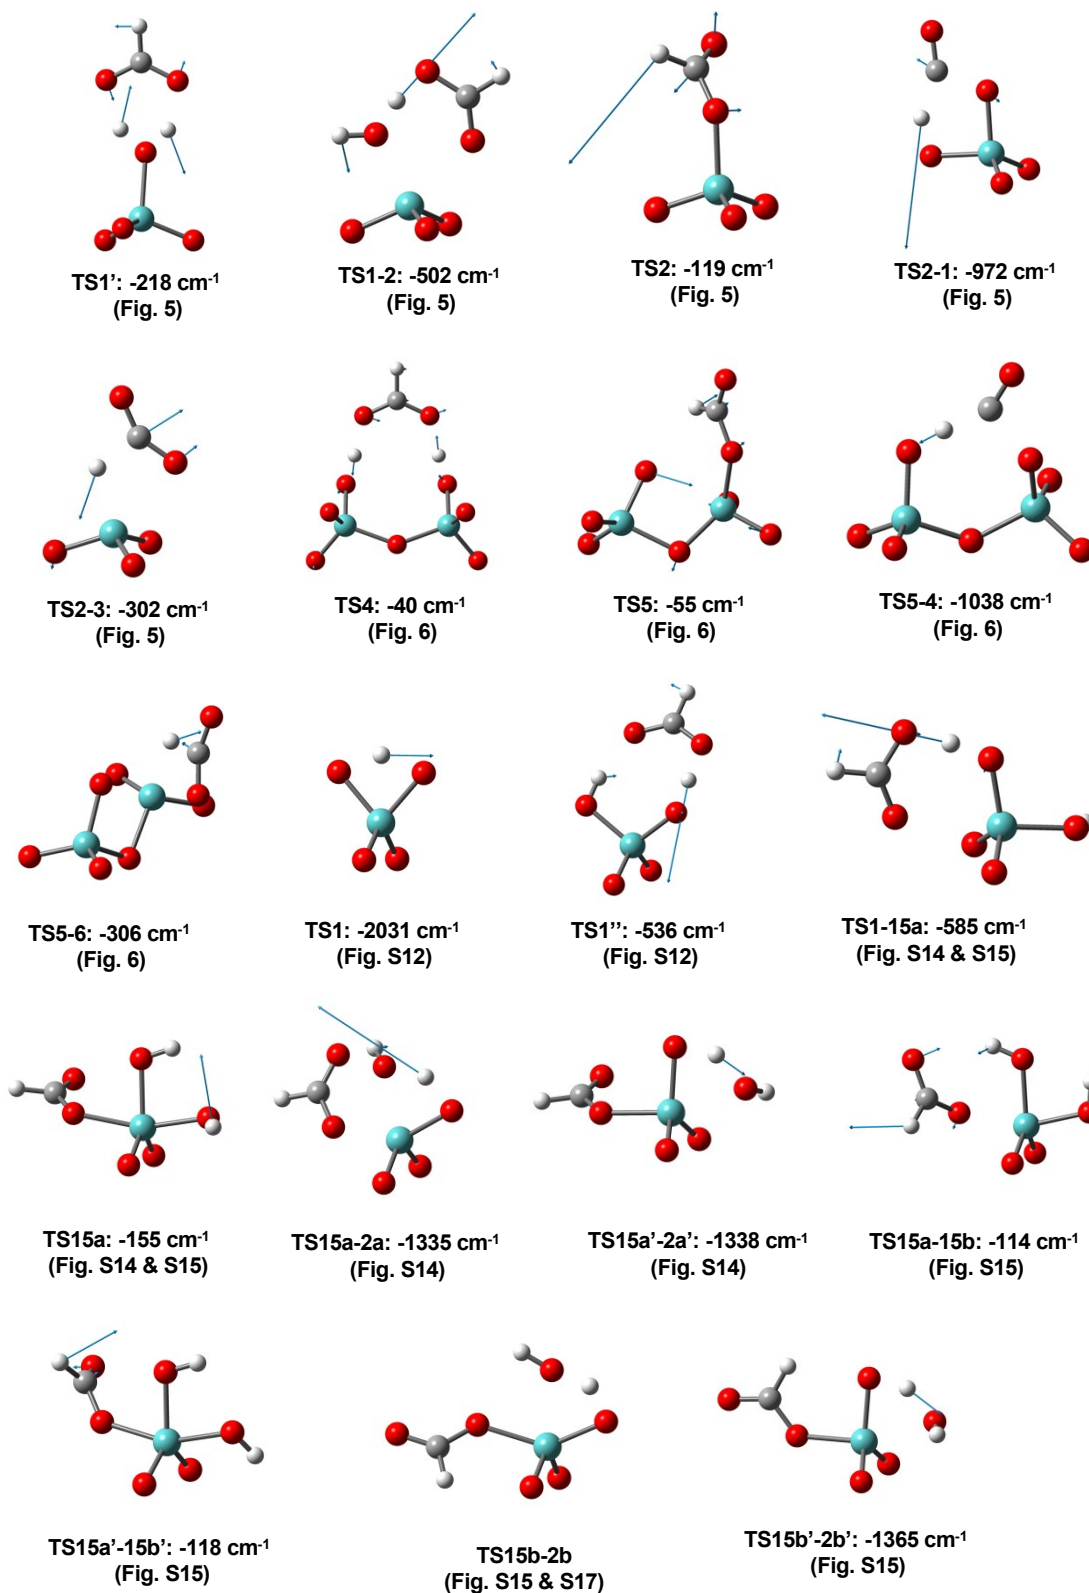

**Fig. S23** Structures of transition states showing vectors associated with imaginary frequencies. Cartesian coordinates for each structure can be found in the associated xyz file.

**Example of DSD-PBEP86-D3(BJ) input for ORCA5.0.3**

```
*xyzfile 0 1 struc.xyz
! B2PLYP D3BJ RIJK def2-QZVPP def2-QZVPP/C def2/JK TIGHTSCF PAL8
%method
FrozenCore FC_ELECTRONS
Exchange x_PBE
Correlation c_P86
LDAOpt C_VWN5
ScalHFX 0.69
ScalDFX 0.31
ScalGGAC 0.44
ScalLDAC 0.44
ScalMP2C 1.00
end
%method
D3S6 0.48
D3A1 0.0
D3S8 0.0
D3A2 5.6
end
%mp2
RI on
DoSCS True
Ps 0.52
Pt 0.22
end
```

**Example of PWPB95-D3(BJ) input for ORCA5.0.3**

```
! RIJK RI-PWPB95 D3BJ def2-QZVPP def2/JK def2-QZVPP/C TIGHTSCF PAL4
*xyzfile 0 1 struc.xyz
```

**References**

1. G. Sheldrick, *Acta Crystallogr. Section C*, **2015**, **71**, 3-8.
2. C.F. Macrae, I.J. Bruno, J.A. Chisholm, P.R. Edgington, P. McCabe, E. Pidcock, L. Rodriguez-Monge, R. Taylor, J. van de Streek, P.A. Wood, *J. Appl. Cryst.* **2008**, **41**, 466–470.
3. Farrugia, L. J.; *J. Appl. Cryst.* **1999**, **32**, 837-838.
